# Supplementary material for: Enhanced magnetic anisotropy of iridium dimers on antisite defects of two-dimensional transition-metal dichalcogenides
Source: Royal Society of Chemistry journal article supplement (doi:10.1039/d4cp00301b), 2024-01-01
Supplement: d4cp00301b1.pdf [file d4cp00301b1.pdf]

**Supporting Information for**

**Enhanced magnetic anisotropy of iridium dimers on antisite defects of two-dimensional transition-metal dichalcogenides**

*Jun Wang,<sup>a</sup> Chen Yao,<sup>a</sup> Siqu Lu,<sup>a,b</sup> Suyun Wang,<sup>a</sup> Dong Zheng,<sup>a,b</sup> Fengqi Song,<sup>a,b</sup> and Jianguo Wan,<sup>a,\*</sup>*

<sup>a</sup> National Laboratory of Solid State Microstructures, Collaborative Innovation Center of Advanced Microstructures, and School of Physics, Nanjing University, Nanjing 210093, China

<sup>b</sup> Atomic Manufacture Institute (AMI), 211805 Nanjing, China

\*Corresponding author. Jianguo Wan, E-mail: wanjg@nju.edu.cn

## S1. Optimized lattice parameters of the pristine and Janus TMD nanosheets

**Table S1.** Optimized in-plane lattice constant of the pristine  $\text{MX}_2$  and Janus  $\text{MXY}$  TMD nanosheets.

| TMDs              | a (Å) | TMDs             | a (Å) |
|-------------------|-------|------------------|-------|
| MoS <sub>2</sub>  | 3.18  | WS <sub>2</sub>  | 3.18  |
| MoSe <sub>2</sub> | 3.32  | WSe <sub>2</sub> | 3.32  |
| MoTe <sub>2</sub> | 3.55  | WTe <sub>2</sub> | 3.55  |
| MoSSe             | 3.22  | WSSe             | 3.25  |
| MoSTe             | 3.32  | WSTe             | 3.37  |
| MoSeTe            | 3.43  | WSeTe            | 3.43  |

## S2. The formation energies of the antisite defects from TMD monolayers

Before constructing the  $\text{Ir}_2@\text{TMD-X}_M$  system, it is necessary to indicate the formation energy of the antisite defect in our study. Here, we calculated the formation energy  $E_f$  of antisite defects  $X_M$  of TMD monolayers (see Fig. S1), which is expressed as,

$$E_f = E_{\text{defect}} - E_{\text{pure}} + \mu_M - \mu_X \quad (2-1)$$

where  $E_{\text{defect}}$  and  $E_{\text{pure}}$  present the total energies of TMD monolayer with and without antisite defects.  $\mu_M$  and  $\mu_X$  are the chemical potentials of metal M and chalcogen X atoms from antisite defects, respectively. The chemical potential of M and X in  $\text{MX}_2$  should satisfy  $\mu_M + 2\mu_X = \mu_M^0 + 2\mu_X^0 + \Delta H_{\text{MX}_2}$ , where  $\mu_M^0$  and  $\mu_X^0$  are the chemical potential of M and X in their bulk form, respectively.  $\Delta H_{\text{MX}_2}$  is the formation enthalpy of the  $\text{MX}_2$  monolayer. Note that it is difficult to specify the exact value of the chemical potential, we can only provide ranges as  $\mu_M^0 + \Delta H_{\text{MX}_2} \leq \mu_M \leq \mu_M^0$ ,  $\mu_X^0 + \frac{1}{2}\Delta H_{\text{MX}_2} \leq \mu_X \leq \mu_X^0$  based on the M-rich and X-rich conditions. The Janus-MXY TMD (X, Y = S/Se/Te; X $\neq$ Y) monolayer is synthesized by replacing one X atom layer with a Y atom layer from the  $\text{MX}_2$  monolayer. Based on this synthesis process, it is logical to assume that the chemical potential range is comparable to that of the  $\text{MX}_2$  ( $\text{MY}_2$ ) monolayer.

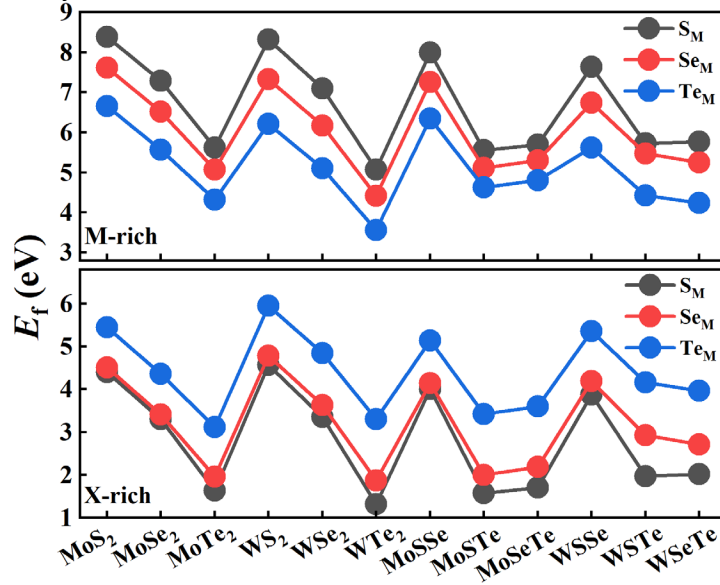

**Fig. S1** The formation energies  $E_f$  of antisite defects in tradition  $\text{MX}_2$  and Janus  $\text{MXY}$  TMD monolayers.

### S3. Stability comparison of Ir<sub>2</sub> adsorbed on different sites of MoS<sub>2</sub>-S<sub>Mo</sub>.

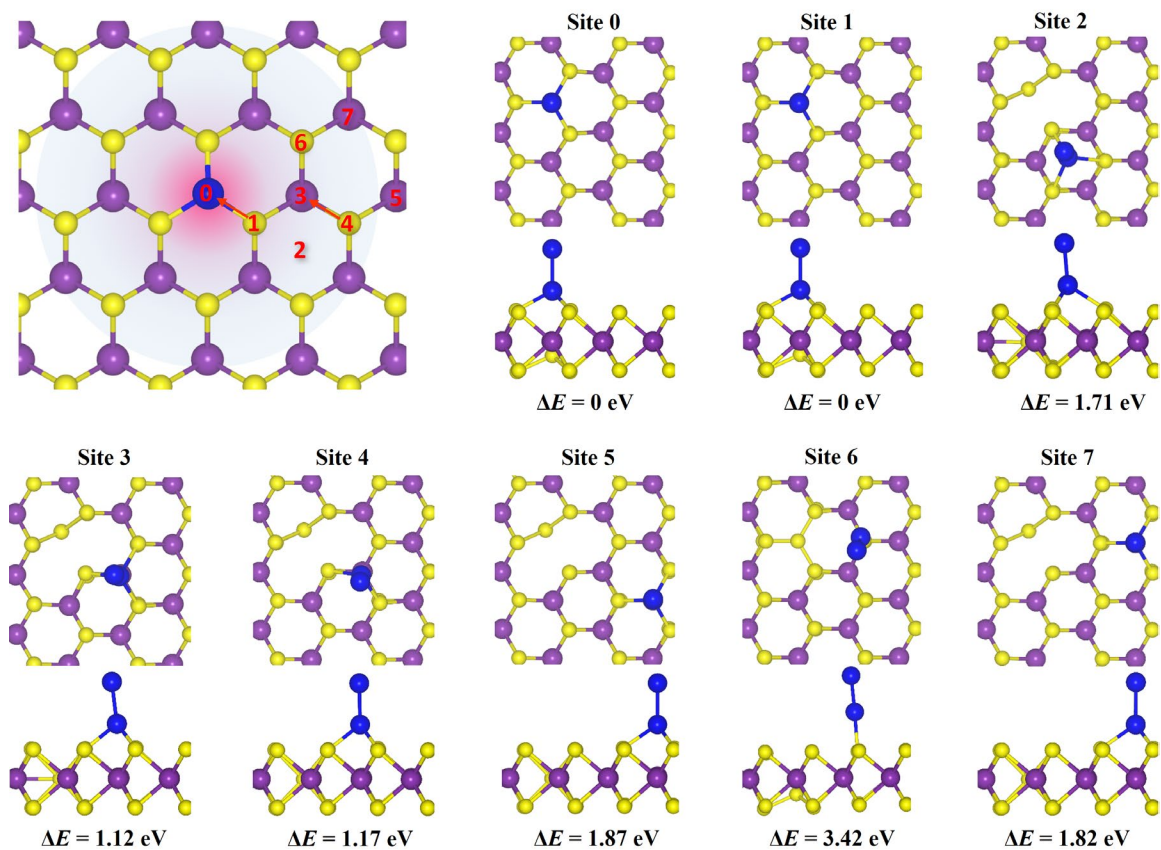

**Fig. S2** Top view, side view and energy difference  $\Delta E$  of Ir<sub>2</sub> adsorbed at the site 0-7 of MoS<sub>2</sub>-S<sub>Mo</sub> at optimal energy. Here,  $\Delta E = E_{tot}^n - E_{tot}^0$ , where  $E_{tot}^n$  and  $E_{tot}^0$  present the total energy of Ir<sub>2</sub>@MoS<sub>2</sub>-S<sub>Mo</sub> at the site n (n = 1-7) and site 0, respectively.



#### S4. The average electrostatic potential difference of Janus TMDs with antisite defects.

**Table S2.** The average electrostatic potential difference  $\Delta V$  (eV) of Janus TMDs with antisite defects.

| TMDs      | S <sub>Mo</sub> | Se <sub>Mo</sub> | Te <sub>Mo</sub> | TMDs     | S <sub>W</sub> | Se <sub>W</sub> | Te <sub>W</sub> |
|-----------|-----------------|------------------|------------------|----------|----------------|-----------------|-----------------|
| MoSSe(↑)  | 0.560           | 0.725            | 0.710            | WSSe(↑)  | 0.809          | 0.711           | 0.681           |
| MoSSe(↓)  | -0.560          | -0.725           | -0.710           | WSSe(↓)  | -0.809         | -0.711          | -0.681          |
| MoSTe(↑)  | 1.276           | 1.276            | 1.338            | WSTe(↑)  | 1.219          | 1.416           | 1.303           |
| MoSTe(↓)  | -1.276          | -1.276           | -1.338           | WSTe(↓)  | -1.219         | -1.416          | -1.303          |
| MoSeTe(↑) | 0.566           | 0.563            | 0.689            | WSeTe(↑) | 0.785          | 0.661           | 0.663           |
| MoSeTe(↓) | -0.566          | -0.563           | -0.689           | WSeTe(↓) | -0.785         | -0.661          | -0.663          |

## S5. Optimized structural parameters of Ir<sub>2</sub>@TMD-X<sub>M</sub> nanosheets.

**Table S3.** Binding energies  $E_b$  (eV), included angles  $\theta$  ( $^\circ$ ), degrees of tilt  $\rho$  (%), distances  $d$  ( $\text{\AA}$ ), Bader charges  $\Delta Q$  (e) of 54 Ir<sub>2</sub>@TMD-X<sub>M</sub> structures.

| TMDs                  | Defect           | $E_b$ | $\theta$ | $\rho$ | $d_{\text{Ir}^A}$ | $d_{\text{Ir}^B}$ | $d_{\text{Ir}^A-\text{Ir}^B}$ | $d_{\text{Ir}^A-\text{def}}$ | $\Delta Q$ | $\Delta Q_{\text{Ir}^A}$ | $\Delta Q_{\text{Ir}^B}$ |
|-----------------------|------------------|-------|----------|--------|-------------------|-------------------|-------------------------------|------------------------------|------------|--------------------------|--------------------------|
| MoS <sub>2</sub>      | S <sub>Mo</sub>  | -4.84 | 0.51     | 0.89   | 3.46              | 1.19              | 2.28                          | 3.52                         | -0.221     | 0.144                    | -0.365                   |
|                       | Se <sub>Mo</sub> | -4.25 | 0.51     | 0.89   | 3.47              | 1.19              | 2.28                          | 3.46                         | -0.224     | 0.150                    | -0.373                   |
|                       | Te <sub>Mo</sub> | -3.69 | 0.69     | 1.20   | 3.48              | 1.20              | 2.28                          | 3.36                         | -0.228     | 0.154                    | -0.382                   |
| MoSe <sub>2</sub>     | S <sub>Mo</sub>  | -4.22 | 0.34     | 0.59   | 3.49              | 1.21              | 2.28                          | 3.67                         | 0.050      | 0.168                    | -0.118                   |
|                       | Se <sub>Mo</sub> | -3.80 | 0.48     | 0.84   | 3.50              | 1.22              | 2.28                          | 3.57                         | 0.048      | 0.184                    | -0.136                   |
|                       | Te <sub>Mo</sub> | -3.41 | 1.04     | 1.82   | 3.51              | 1.24              | 2.28                          | 3.41                         | 0.053      | 0.193                    | -0.140                   |
| MoTe <sub>2</sub>     | S <sub>Mo</sub>  | -7.11 | 13.73    | 24.42  | 1.01              | -1.72             | 2.81                          | 2.28                         | 0.752      | 0.468                    | 0.284                    |
|                       | Se <sub>Mo</sub> | -4.10 | 1.35     | 2.35   | 2.73              | 0.47              | 2.27                          | 2.52                         | 0.621      | 0.327                    | 0.294                    |
|                       | Te <sub>Mo</sub> | -3.65 | 0.45     | 0.79   | 2.93              | 0.69              | 2.24                          | 2.78                         | 0.578      | 0.319                    | 0.259                    |
| WS <sub>2</sub>       | S <sub>W</sub>   | -4.92 | 18.74    | 33.92  | 1.89              | -0.64             | 2.67                          | 2.33                         | -0.162     | 0.055                    | -0.217                   |
|                       | Se <sub>W</sub>  | -5.91 | 0.14     | 0.24   | 1.17              | -1.41             | 2.58                          | 2.35                         | -0.040     | -0.141                   | 0.101                    |
|                       | Te <sub>W</sub>  | -3.30 | 0.28     | 0.49   | 3.46              | 1.19              | 2.27                          | 3.34                         | -0.207     | 0.136                    | -0.342                   |
| WSe <sub>2</sub>      | S <sub>W</sub>   | -4.02 | 0.48     | 0.85   | 3.51              | 1.23              | 2.28                          | 3.66                         | 0.067      | 0.156                    | -0.089                   |
|                       | Se <sub>W</sub>  | -3.57 | 0.16     | 0.28   | 3.51              | 1.23              | 2.28                          | 3.55                         | 0.064      | 0.215                    | -0.152                   |
|                       | Te <sub>W</sub>  | -3.19 | 1.99     | 3.47   | 3.60              | 1.33              | 2.27                          | 3.37                         | 0.068      | 0.142                    | -0.075                   |
| WTe <sub>2</sub>      | S <sub>W</sub>   | -6.94 | 18.03    | 32.55  | 0.81              | -1.86             | 2.80                          | 2.27                         | 0.794      | 0.502                    | 0.292                    |
|                       | Se <sub>W</sub>  | -3.94 | 1.07     | 1.87   | 2.78              | 0.53              | 2.25                          | 2.55                         | 0.601      | 0.343                    | 0.258                    |
|                       | Te <sub>W</sub>  | -3.92 | 5.37     | 9.40   | 3.13              | 0.87              | 2.27                          | 2.74                         | 0.594      | 0.259                    | 0.335                    |
| MoSSe( $\uparrow$ )   | S <sub>Mo</sub>  | -3.86 | 0.50     | 0.87   | 3.39              | 1.14              | 2.25                          | 3.51                         | -0.228     | 0.132                    | -0.350                   |
|                       | Se <sub>Mo</sub> | -4.04 | 0.29     | 0.51   | 3.84              | 1.16              | 2.27                          | 3.39                         | -0.228     | 0.113                    | -0.341                   |
|                       | Te <sub>Mo</sub> | -3.54 | 0.06     | 0.11   | 3.46              | 1.19              | 2.27                          | 3.24                         | -0.230     | 0.133                    | -0.363                   |
| MoSSe( $\downarrow$ ) | S <sub>Mo</sub>  | -3.96 | 0.23     | 0.40   | 3.62              | 1.33              | 2.29                          | 3.74                         | 0.076      | 0.142                    | -0.065                   |
|                       | Se <sub>Mo</sub> | -4.17 | 0.91     | 1.59   | 3.37              | 1.33              | 2.29                          | 3.68                         | 0.076      | 0.145                    | -0.068                   |
|                       | Te <sub>Mo</sub> | -3.79 | 0.32     | 0.56   | 3.62              | 1.33              | 2.29                          | 3.58                         | 0.076      | 0.135                    | -0.058                   |
| MoSTe( $\uparrow$ )   | S <sub>Mo</sub>  | -8.66 | 89.99    | > 5e5  | -0.07             | -0.07             | 2.56                          | 2.32                         | -0.189     | -0.086                   | -0.102                   |
|                       | Se <sub>Mo</sub> | -3.62 | 7.67     | 13.48  | 3.06              | 0.78              | 2.29                          | 2.42                         | -0.251     | 0.060                    | -0.310                   |
|                       | Te <sub>Mo</sub> | -2.99 | 5.47     | 9.58   | 3.20              | 0.97              | 2.24                          | 2.73                         | -0.196     | 0.123                    | -0.319                   |
| MoSTe( $\downarrow$ ) | S <sub>Mo</sub>  | -6.00 | 0.54     | 0.95   | 1.45              | -1.28             | 2.73                          | 2.23                         | 0.753      | 0.465                    | 0.289                    |
|                       | Se <sub>Mo</sub> | -6.07 | 0.30     | 0.52   | 1.41              | -1.33             | 2.74                          | 2.35                         | 0.901      | 0.491                    | 0.410                    |

|           |                  |       |       |        |      |       |      |      |        |        |        |
|-----------|------------------|-------|-------|--------|------|-------|------|------|--------|--------|--------|
|           | Te <sub>Mo</sub> | -3.90 | 0.07  | 0.12   | 3.75 | 1.49  | 2.26 | 3.39 | 0.472  | 0.165  | 0.306  |
| MoSeTe(↑) | S <sub>Mo</sub>  | -8.95 | 73.85 | 345.28 | 1.26 | -0.30 | 2.51 | 2.26 | 0.403  | 0.208  | 0.195  |
|           | Se <sub>Mo</sub> | -3.78 | 4.56  | 7.97   | 3.03 | 0.79  | 2.25 | 2.48 | 0.050  | 0.156  | -0.105 |
|           | Te <sub>Mo</sub> | -3.27 | 9.80  | 17.27  | 3.18 | 0.95  | 2.26 | 2.75 | 0.146  | 0.205  | -0.059 |
| MoSeTe(↓) | S <sub>Mo</sub>  | -6.23 | 0.61  | 1.06   | 1.37 | -1.35 | 2.72 | 2.23 | 0.754  | 0.472  | 0.281  |
|           | Se <sub>Mo</sub> | -6.21 | 0.39  | 0.68   | 1.32 | -1.41 | 2.73 | 2.37 | 0.799  | 0.454  | 0.345  |
|           | Te <sub>Mo</sub> | -3.87 | 0.07  | 0.12   | 3.77 | 1.46  | 2.31 | 3.96 | 0.467  | 0.210  | 0.257  |
| WSSe(↑)   | S <sub>w</sub>   | -4.20 | 0.33  | 0.58   | 3.38 | 1.13  | 2.25 | 3.50 | -0.207 | 0.213  | -0.420 |
|           | Se <sub>w</sub>  | -3.67 | 0.11  | 0.20   | 3.40 | 1.15  | 2.25 | 3.39 | -0.209 | 0.138  | -0.348 |
|           | Te <sub>w</sub>  | -3.10 | 0.48  | 0.83   | 3.42 | 1.17  | 2.26 | 3.23 | -0.207 | 0.187  | -0.394 |
| WSSe(↓)   | S <sub>w</sub>   | -4.19 | 5.91  | 10.36  | 3.41 | 1.15  | 2.27 | 3.16 | 0.125  | 0.208  | -0.083 |
|           | Se <sub>w</sub>  | -3.75 | 0.34  | 0.59   | 3.59 | 1.30  | 2.29 | 3.64 | 0.079  | 0.179  | -0.100 |
|           | Te <sub>w</sub>  | -3.35 | 0.52  | 0.91   | 3.58 | 1.29  | 2.28 | 3.51 | 0.081  | 0.161  | -0.080 |
| WSTe(↑)   | S <sub>w</sub>   | -5.77 | 47.38 | 108.67 | 2.14 | 0.56  | 2.34 | 2.27 | -0.316 | -0.036 | -0.281 |
|           | Se <sub>w</sub>  | -4.02 | 8.25  | 14.51  | 3.02 | 0.75  | 2.29 | 2.40 | -0.210 | 0.094  | -0.305 |
|           | Te <sub>w</sub>  | -2.71 | 0.31  | 0.55   | 3.36 | 1.14  | 2.23 | 2.97 | -0.188 | 0.141  | -0.330 |
| WSTe(↓)   | S <sub>w</sub>   | -6.99 | 13.22 | 23.50  | 1.09 | -1.77 | 2.94 | 2.25 | 0.723  | 0.528  | 0.195  |
|           | Se <sub>w</sub>  | -3.80 | 0.72  | 1.25   | 3.74 | 1.47  | 2.26 | 4.06 | 0.493  | 0.194  | 0.299  |
|           | Te <sub>w</sub>  | -3.74 | 0.27  | 0.46   | 3.73 | 1.47  | 2.26 | 3.96 | 0.484  | 0.182  | 0.303  |
| WSeTe(↑)  | S <sub>w</sub>   | -6.12 | 51.63 | 126.29 | 1.28 | -0.28 | 2.51 | 2.26 | 0.160  | 0.028  | 0.132  |
|           | Se <sub>w</sub>  | -3.48 | 0.09  | 0.15   | 2.93 | 1.15  | 2.22 | 2.74 | 0.082  | 0.161  | -0.079 |
|           | Te <sub>w</sub>  | -3.25 | 9.66  | 17.02  | 3.14 | 1.17  | 2.26 | 2.73 | 0.156  | 0.201  | -0.046 |
| WSeTe(↓)  | S <sub>w</sub>   | -4.33 | 9.02  | 15.87  | 3.43 | 1.17  | 2.29 | 3.30 | 0.575  | 0.250  | 0.324  |
|           | Se <sub>w</sub>  | -3.97 | 0.02  | 0.04   | 3.65 | 1.30  | 2.25 | 3.97 | 0.474  | 0.198  | 0.276  |
|           | Te <sub>w</sub>  | -3.74 | 0.15  | 0.26   | 3.65 | 1.29  | 2.28 | 3.78 | 0.482  | 0.224  | 0.258  |

S6. Optimized configurations of  $\text{Ir}_2@\text{TMD-X}_M$  nanosheets.

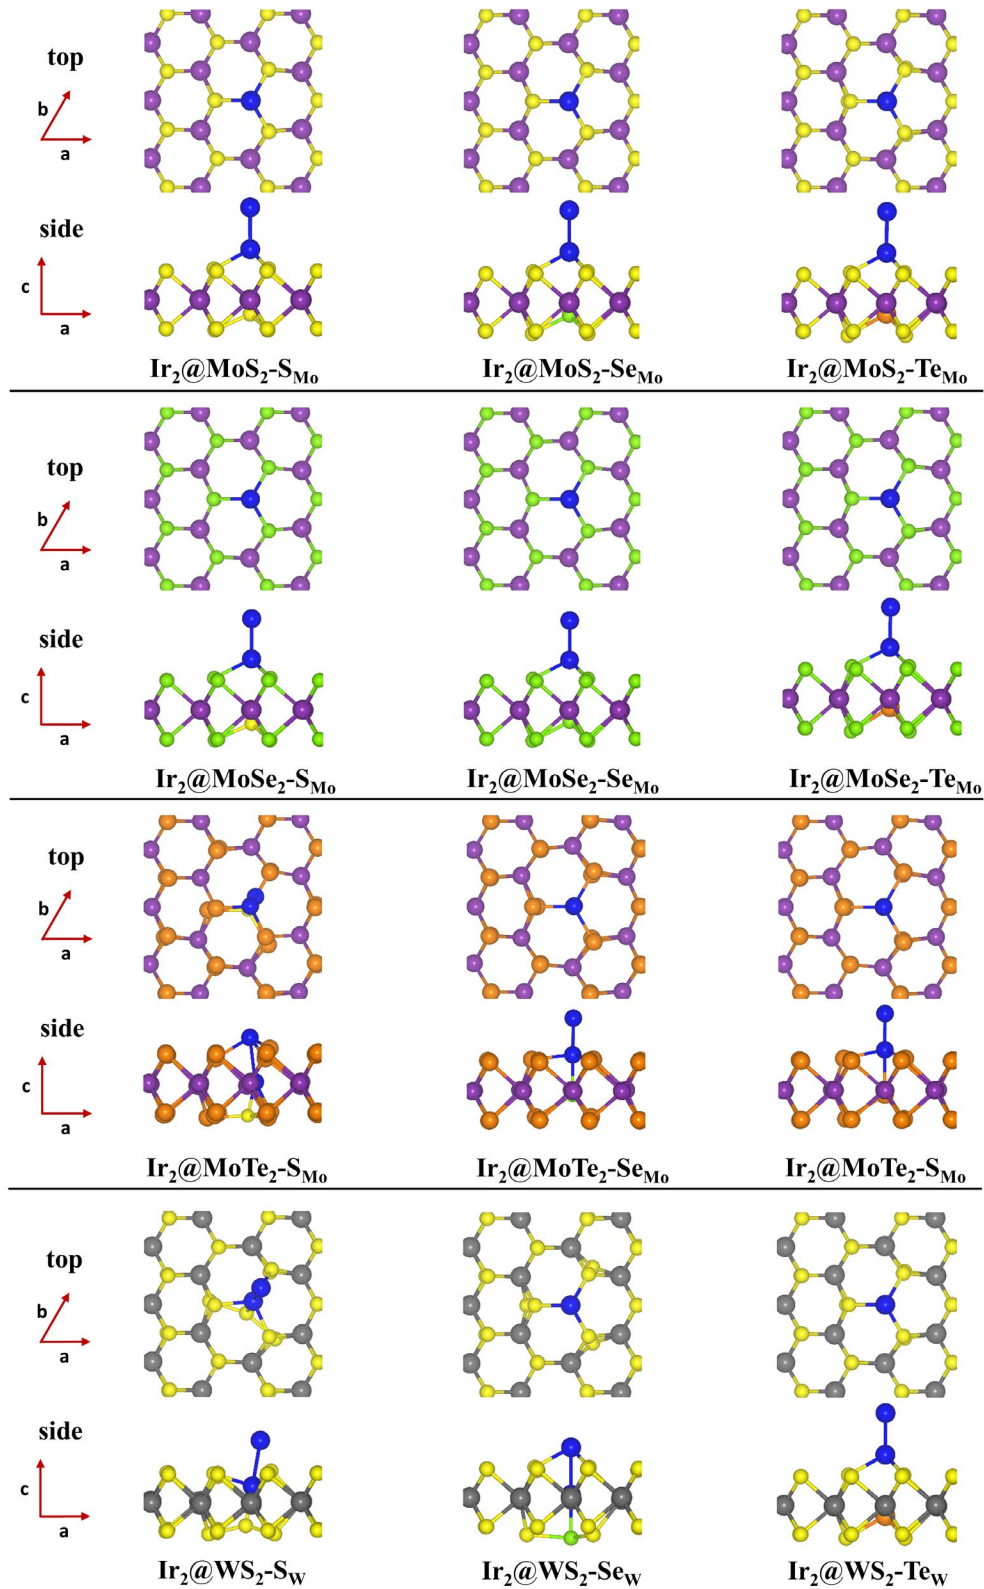

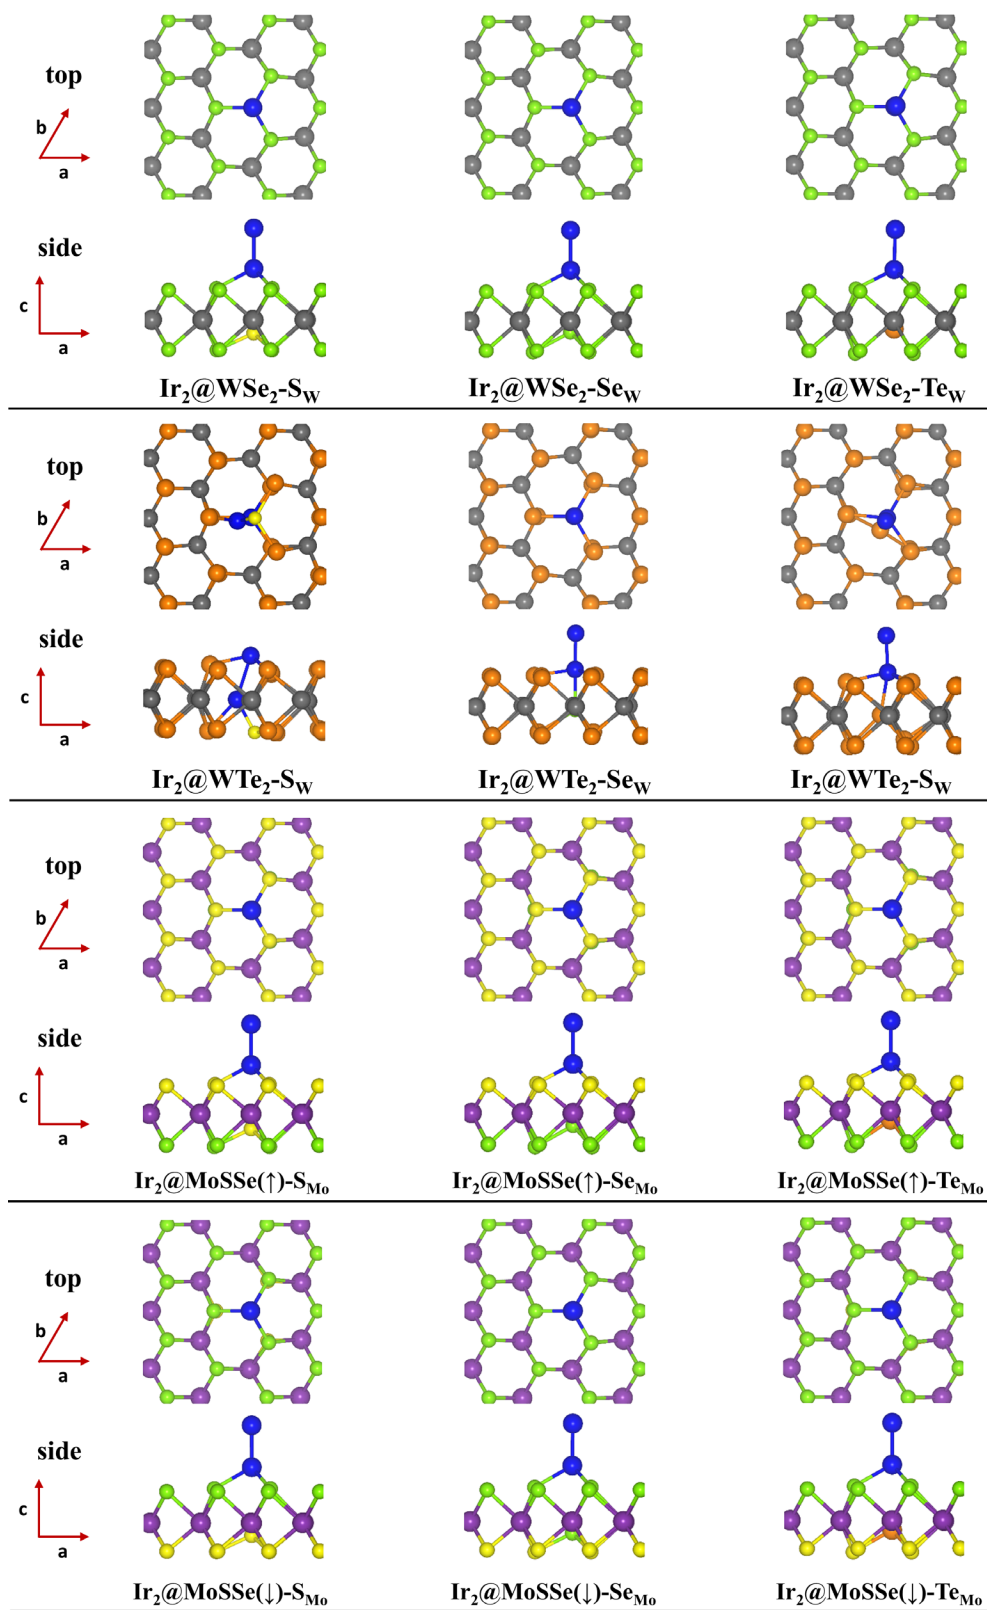

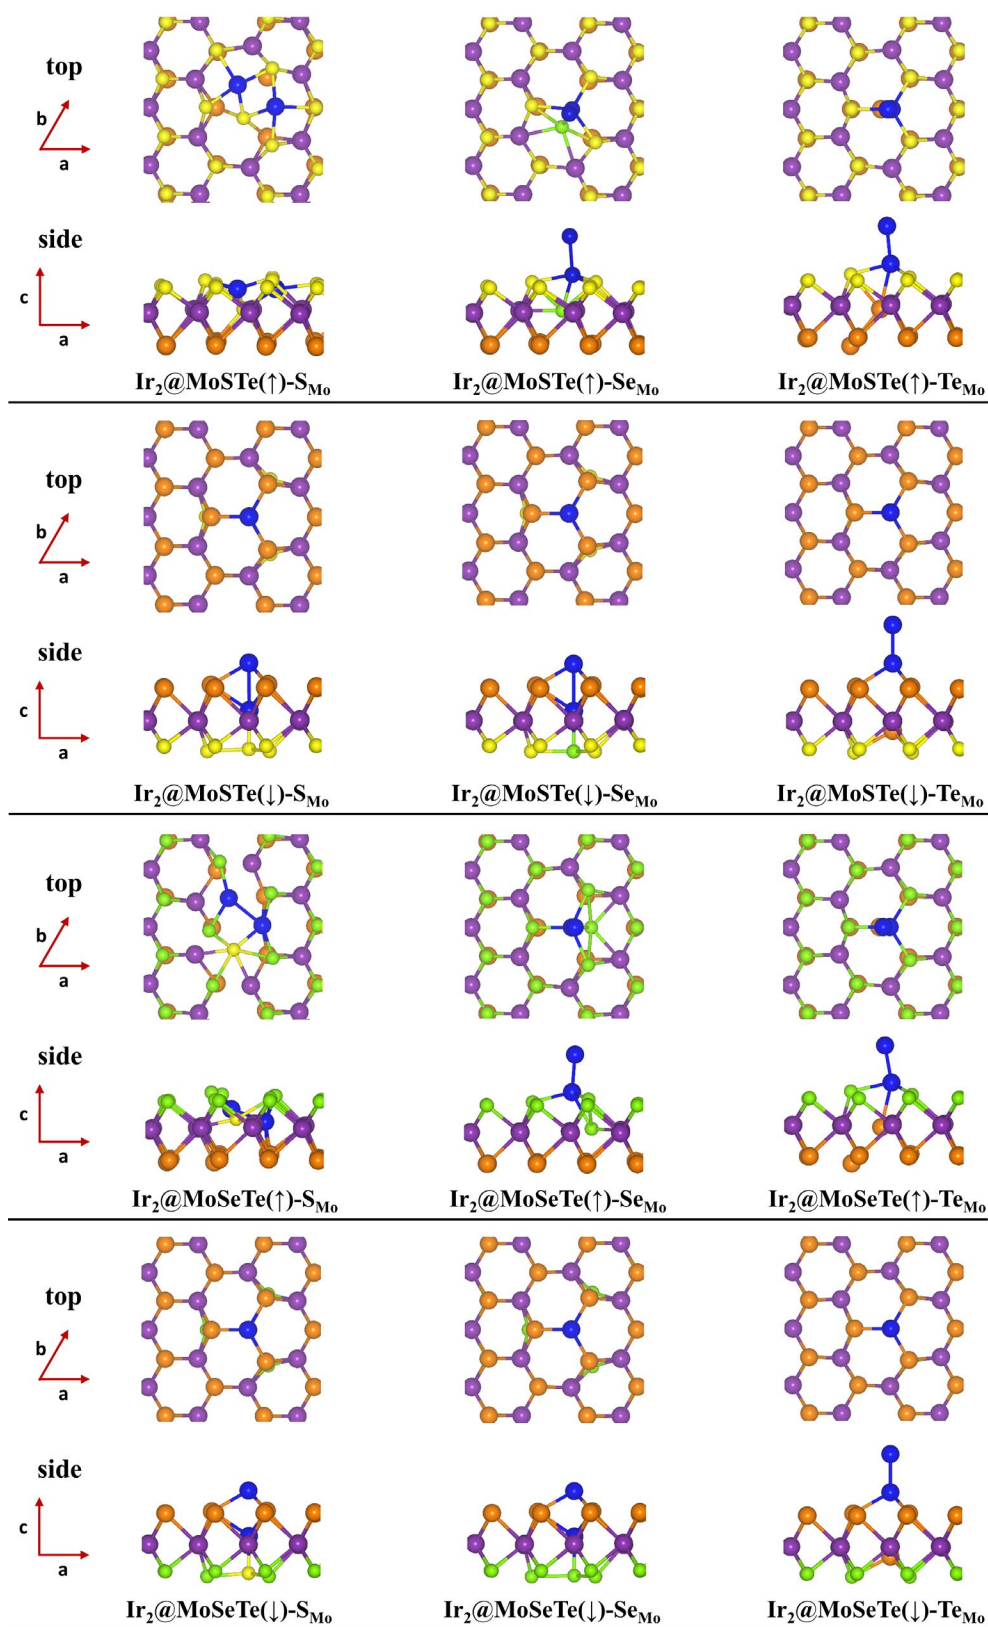



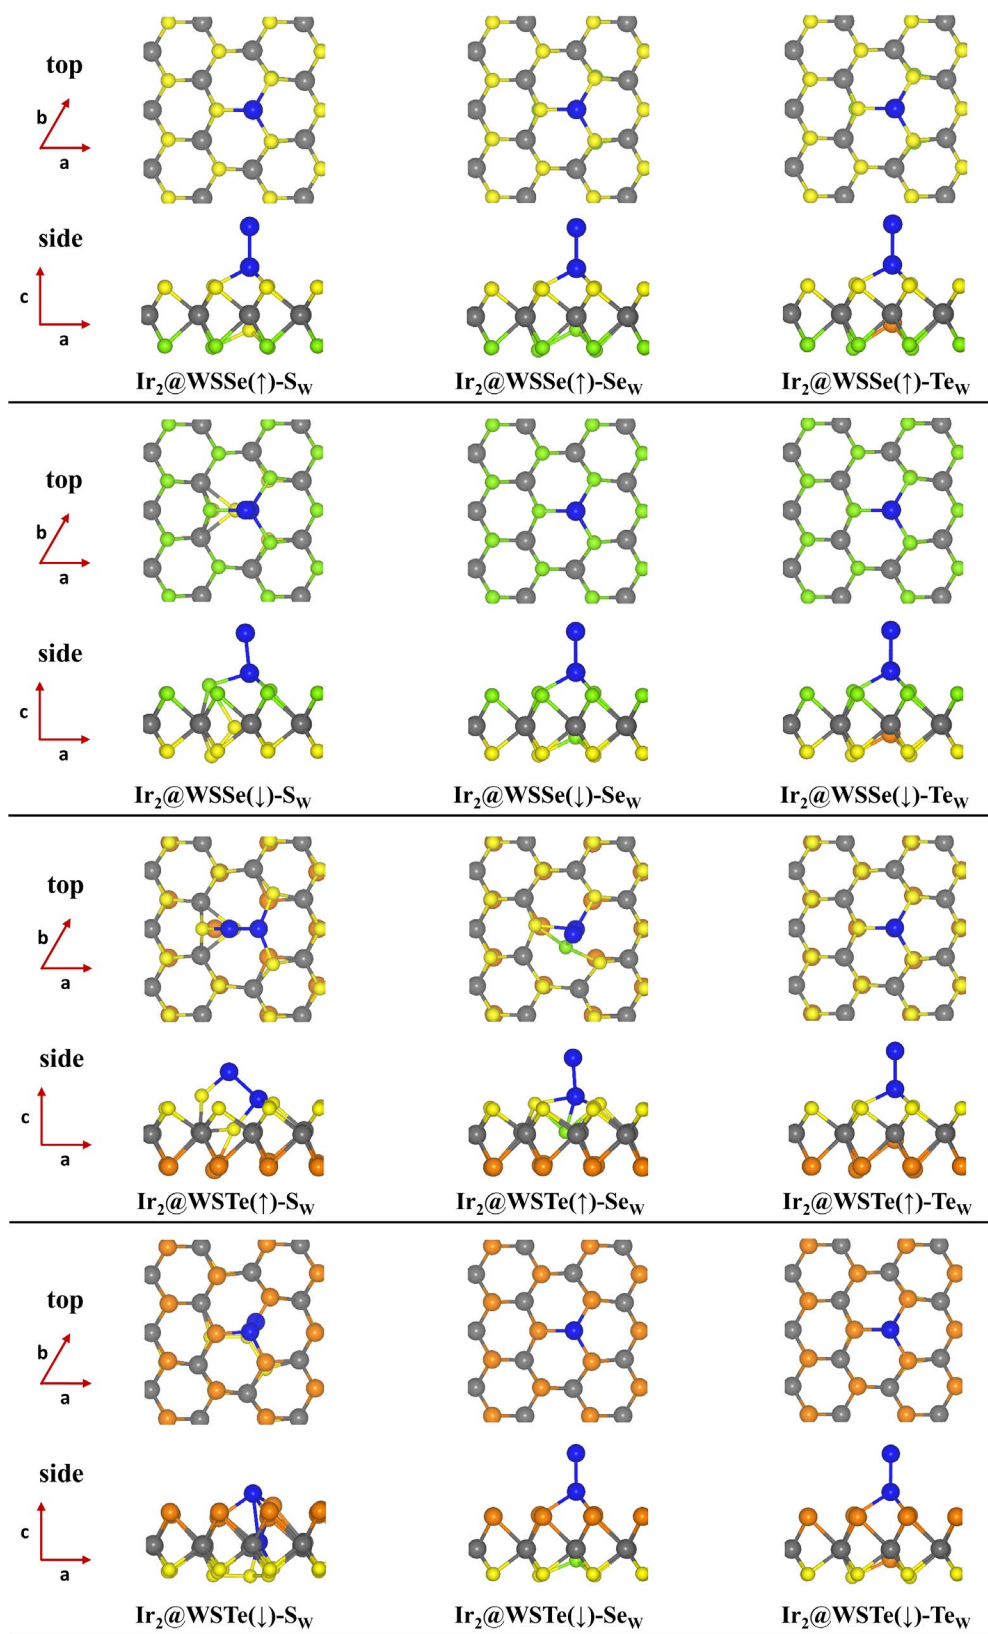

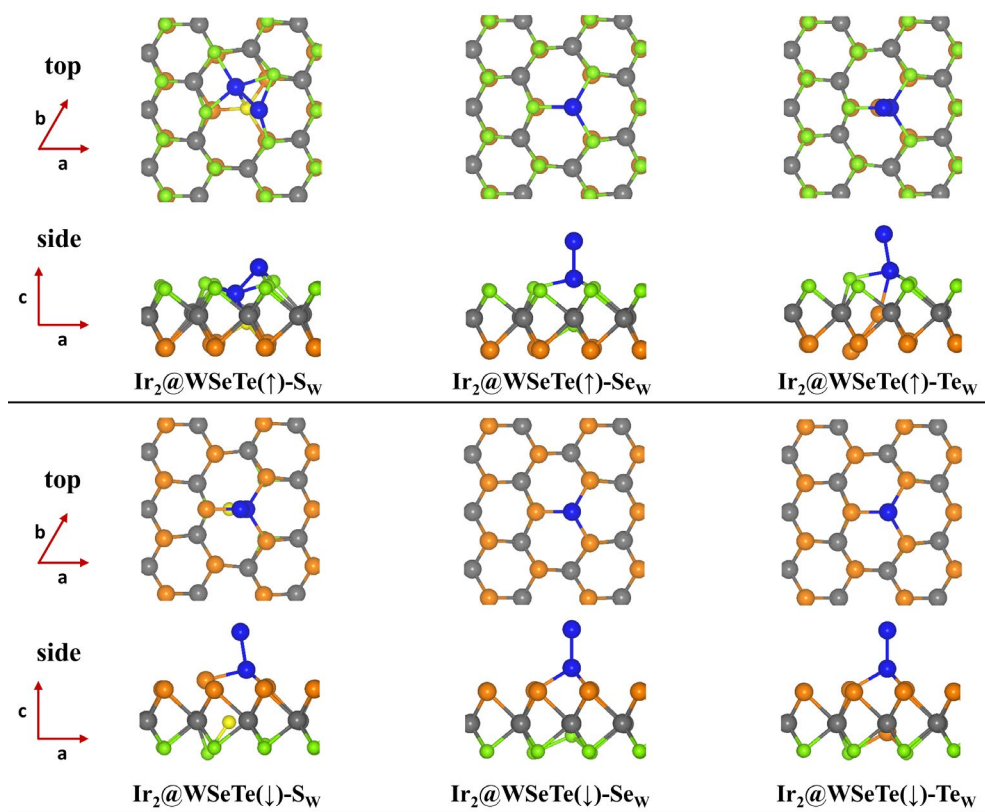

**Fig. S3** Top and side views of  $\text{Ir}_2@TMD\text{-}X_M$  ( $M = \text{Mo}, \text{W}$ ;  $X = \text{S}, \text{Se}, \text{Te}$ ) nanosheets. The yellow, green, orange, purple, grey and blue balls represent S, Se, Te, Mo, W and Ir atoms, respectively.



### S7. The dissociation energy of top Ir atom and Ir<sub>2</sub> from Ir<sub>2</sub>@TMD-X<sub>M</sub> configurations.

In order to further verify the stability of the composite structures, the dissociation energies  $E_d(\text{Ir}_2)$  and  $E_d(\text{Ir}^A)$  are plotted in Figure S3, using the following formula:

$$E_d = E_{\text{Ir}^A/\text{Ir}_2} + E_{\text{re}} - E_{\text{Ir}_2@\text{TMD-X}_M}$$

where  $E_{\text{Ir}_2@\text{TMD-X}_M}$ ,  $E_{\text{Ir}^A/\text{Ir}_2}$  and  $E_{\text{re}}$  are the energies of the adsorbed Ir<sub>2</sub> dimer TMD systems, freestanding Ir<sup>A</sup> atom or Ir<sub>2</sub> dimer, the remain part after dissociating, respectively.

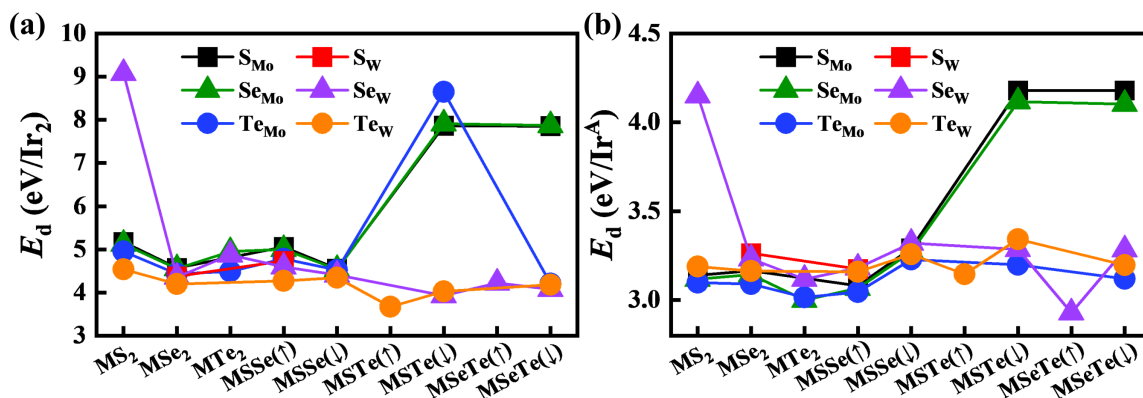

**Fig. S4** The dissociation energy  $E_d$  for (c) Ir<sub>2</sub> dimer and (d) top Ir<sup>A</sup> atom dissociating from composite systems. Here M (= Mo, W) in the abscissa is the same as M of X<sub>M</sub> in legend.

## S8. Magnetic parameters of vertical Ir<sub>2</sub>@TMD-X<sub>M</sub> nanosheets.

**Table S4.** MAEs (meV), total magnetic moments  $M$  ( $\mu_B$ ), spin moments  $M_S$  ( $\mu_B$ ) and orbital moments  $M_L$  ( $\mu_B$ ) of 37 vertical Ir<sub>2</sub>@TMD-X<sub>M</sub> structures.

| TMDs              | Defect           | MAE   | $M_{tot}$ | $M(\text{Ir}_2)$ | Ir <sup>A</sup>   |               |                   |               | Ir <sup>B</sup>   |               |                   |               |
|-------------------|------------------|-------|-----------|------------------|-------------------|---------------|-------------------|---------------|-------------------|---------------|-------------------|---------------|
|                   |                  |       |           |                  | $M_S^{\parallel}$ | $M_S^{\perp}$ | $M_L^{\parallel}$ | $M_L^{\perp}$ | $M_S^{\parallel}$ | $M_S^{\perp}$ | $M_L^{\parallel}$ | $M_L^{\perp}$ |
| MoS <sub>2</sub>  | S <sub>Mo</sub>  | 71.09 | 1.644     | 1.603            | 0.953             | 0.039         | 0.336             | 1.400         | 0.209             | 0.268         | 0.073             | 0.017         |
|                   | Se <sub>Mo</sub> | 70.33 | 1.672     | 1.639            | 0.903             | 0.060         | 0.347             | 1.388         | 0.211             | 0.273         | 0.077             | 0.017         |
|                   | Te <sub>Mo</sub> | 70.83 | 1.695     | 1.673            | 0.920             | 0.082         | 0.343             | 1.375         | 0.219             | 0.278         | 0.074             | 0.018         |
| MoSe <sub>2</sub> | S <sub>Mo</sub>  | 70.71 | 1.741     | 1.724            | 0.918             | 0.097         | 0.348             | 1.354         | 0.235             | 0.295         | 0.097             | 0.035         |
|                   | Se <sub>Mo</sub> | 69.33 | 1.762     | 1.761            | 0.932             | 0.120         | 0.351             | 1.344         | 0.241             | 0.303         | 0.097             | 0.035         |
|                   | Te <sub>Mo</sub> | 70.71 | 1.764     | 1.783            | 0.950             | 0.139         | 0.342             | 1.335         | 0.243             | 0.307         | 0.099             | 0.034         |
| MoTe <sub>2</sub> | Se <sub>Mo</sub> | -3.64 | 0.078     | 0.173            | 0.229             | -0.083        | 0.019             | 0.297         | -0.026            | 0.006         | -0.001            | -0.047        |
|                   | Te <sub>Mo</sub> | -1.90 | -0.033    | -0.102           | -0.150            | -0.086        | 0.020             | 0.153         | 0.035             | 0.020         | 0.026             | 0.027         |
| WS <sub>2</sub>   | Se <sub>W</sub>  | 0     | 0         | 0                | 0                 | 0             | 0                 | 0             | 0                 | 0             | 0                 | 0             |
|                   | Te <sub>W</sub>  | 75.93 | 1.698     | 1.577            | 0.903             | 0.021         | 0.313             | 1.415         | 0.215             | 0.280         | 0.088             | 0.025         |
| WSe <sub>2</sub>  | S <sub>W</sub>   | 70.69 | 1.702     | 1.705            | 0.924             | 0.072         | 0.323             | 1.366         | 0.235             | 0.301         | 0.112             | 0.045         |
|                   | Se <sub>W</sub>  | 70.63 | 1.732     | 1.749            | 0.941             | 0.100         | 0.326             | 1.353         | 0.243             | 0.309         | 0.110             | 0.044         |
|                   | Te <sub>W</sub>  | 72.61 | 1.735     | 1.768            | 0.958             | 0.118         | 0.316             | 1.346         | 0.244             | 0.308         | 0.109             | 0.044         |
| WTe <sub>2</sub>  | Se <sub>W</sub>  | 0.85  | -0.025    | -0.046           | -0.074            | -0.004        | 0.003             | -0.037        | 0.008             | -0.002        | -0.005            | 0.010         |
| MoSSc(↑)          | S <sub>Mo</sub>  | 79.13 | 1.388     | 1.371            | 0.836             | -0.070        | 0.296             | 1.467         | 0.196             | 0.260         | 0.076             | 0.016         |
|                   | Se <sub>Mo</sub> | 74.46 | 1.553     | 1.534            | 0.877             | 0.010         | 0.331             | 1.424         | 0.199             | 0.270         | 0.082             | 0.014         |
|                   | Te <sub>Mo</sub> | 73.67 | 1.636     | 1.622            | 0.914             | 0.060         | 0.325             | 1.387         | 0.213             | 0.279         | 0.078             | 0.015         |
| MoSSc(↓)          | S <sub>Mo</sub>  | 65.22 | 1.815     | 1.783            | 0.923             | 0.137         | 0.378             | 1.324         | 0.237             | 0.277         | 0.080             | 0.043         |
|                   | Se <sub>Mo</sub> | 65.23 | 1.820     | 1.800            | 0.923             | 0.151         | 0.389             | 1.320         | 0.237             | 0.281         | 0.084             | 0.043         |
|                   | Te <sub>Mo</sub> | 67.75 | 1.785     | 1.779            | 0.929             | 0.139         | 0.378             | 1.335         | 0.233             | 0.279         | 0.085             | 0.041         |
| MoSTe(↓)          | S <sub>Mo</sub>  | 0     | 0         | 0                | 0                 | 0             | 0                 | 0             | 0                 | 0             | 0                 | 0             |
|                   | Se <sub>Mo</sub> | 0     | 0         | 0                | 0                 | 0             | 0                 | 0             | 0                 | 0             | 0                 | 0             |
|                   | Te <sub>Mo</sub> | 64.73 | 1.808     | 1.842            | 0.889             | 0.155         | 0.465             | 1.402         | 0.141             | 0.135         | 0.091             | -0.004        |
| MoSeTe(↓)         | S <sub>Mo</sub>  | 0     | 0         | 0                | 0                 | 0             | 0                 | 0             | 0                 | 0             | 0                 | 0             |
|                   | Se <sub>Mo</sub> | 0     | 0         | 0                | 0                 | 0             | 0                 | 0             | 0                 | 0             | 0                 | 0             |
|                   | Te <sub>Mo</sub> | 65.88 | 1.811     | 1.851            | 0.947             | 0.165         | 0.389             | 1.330         | 0.249             | 0.297         | 0.103             | 0.054         |
| WSSc(↑)           | S <sub>W</sub>   | 82.01 | 1.254     | 1.273            | 0.823             | -0.108        | 0.286             | 1.492         | 0.201             | 0.273         | 0.098             | 0.016         |
|                   | Se <sub>W</sub>  | 81.35 | 1.317     | 1.343            | 0.838             | -0.079        | 0.279             | 1.476         | 0.202             | 0.275         | 0.087             | 0.017         |
|                   | Te <sub>W</sub>  | 82.14 | 1.389     | 1.432            | 0.872             | -0.036        | 0.280             | 1.448         | 0.202             | 0.276         | 0.092             | 0.020         |
| WSSc(↓)           | Se <sub>W</sub>  | 67.66 | 1.801     | 1.801            | 0.945             | 0.133         | 0.350             | 1.328         | 0.246             | 0.298         | 0.099             | 0.047         |

|          |                 |       |        |        |        |        |        |       |       |       |       |        |
|----------|-----------------|-------|--------|--------|--------|--------|--------|-------|-------|-------|-------|--------|
|          | Te <sub>w</sub> | 69.19 | 1.779  | 1.796  | 0.949  | 0.134  | 0.346  | 1.335 | 0.241 | 0.298 | 0.104 | 0.047  |
| WSTe(↑)  | Te <sub>w</sub> | 79.06 | 0.917  | 1.029  | 0.909  | 0.083  | 0.358  | 1.354 | 0.239 | 0.276 | 0.103 | 0.067  |
| WSTe(↓)  | Se <sub>w</sub> | 69.68 | 1.721  | 1.742  | 0.717  | -0.159 | 0.186  | 1.430 | 0.134 | 0.258 | 0.110 | -0.012 |
|          | Te <sub>w</sub> | 73.52 | 1.679  | 1.724  | 0.914  | 0.072  | 0.356  | 1.376 | 0.236 | 0.275 | 0.104 | 0.067  |
| WSeTe(↑) | Se <sub>w</sub> | -0.98 | -0.043 | -0.077 | -0.131 | 0.010  | -0.023 | 0.038 | 0.023 | 0.041 | 0.019 | 0.027  |
| WSeTe(↓) | Se <sub>w</sub> | 71.09 | 1.688  | 1.709  | 0.918  | 0.056  | 0.321  | 1.367 | 0.241 | 0.284 | 0.114 | 0.072  |
|          | Te <sub>w</sub> | 68.72 | 1.780  | 1.829  | 0.959  | 0.139  | 0.354  | 1.343 | 0.239 | 0.293 | 0.118 | 0.062  |

---

### S9. Projected density of states of $\text{Ir}_2@TMD-X_M$ nanosheets.

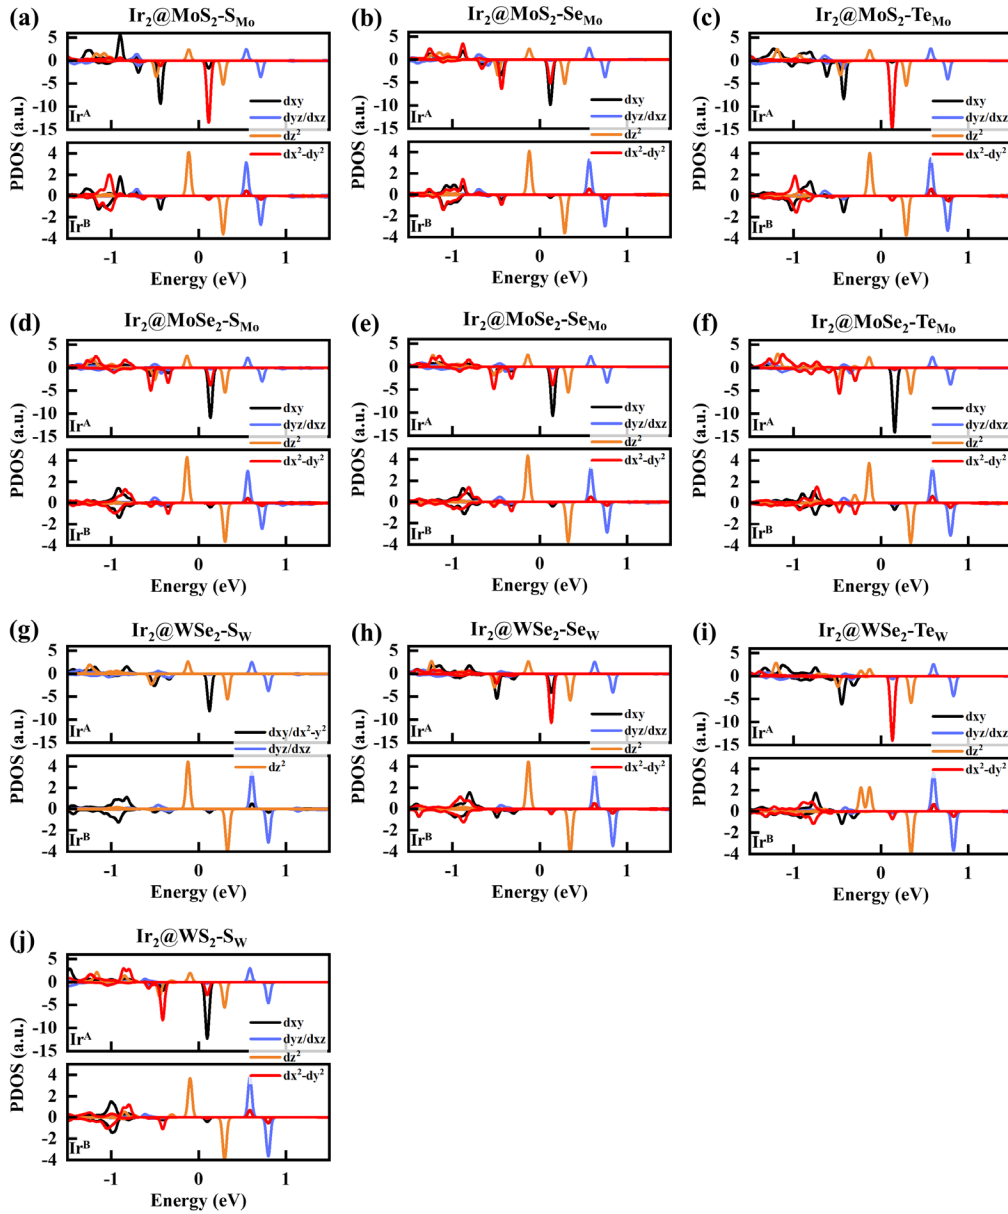

**Fig. S5** Projected density of states of d orbitals of  $\text{Ir}^A$  and  $\text{Ir}^B$  atoms in  $\text{Ir}_2@MX_2-X_M$  ( $M = \text{Mo}, \text{W}; X = \text{S}, \text{Se}, \text{Te}$ ) structures.

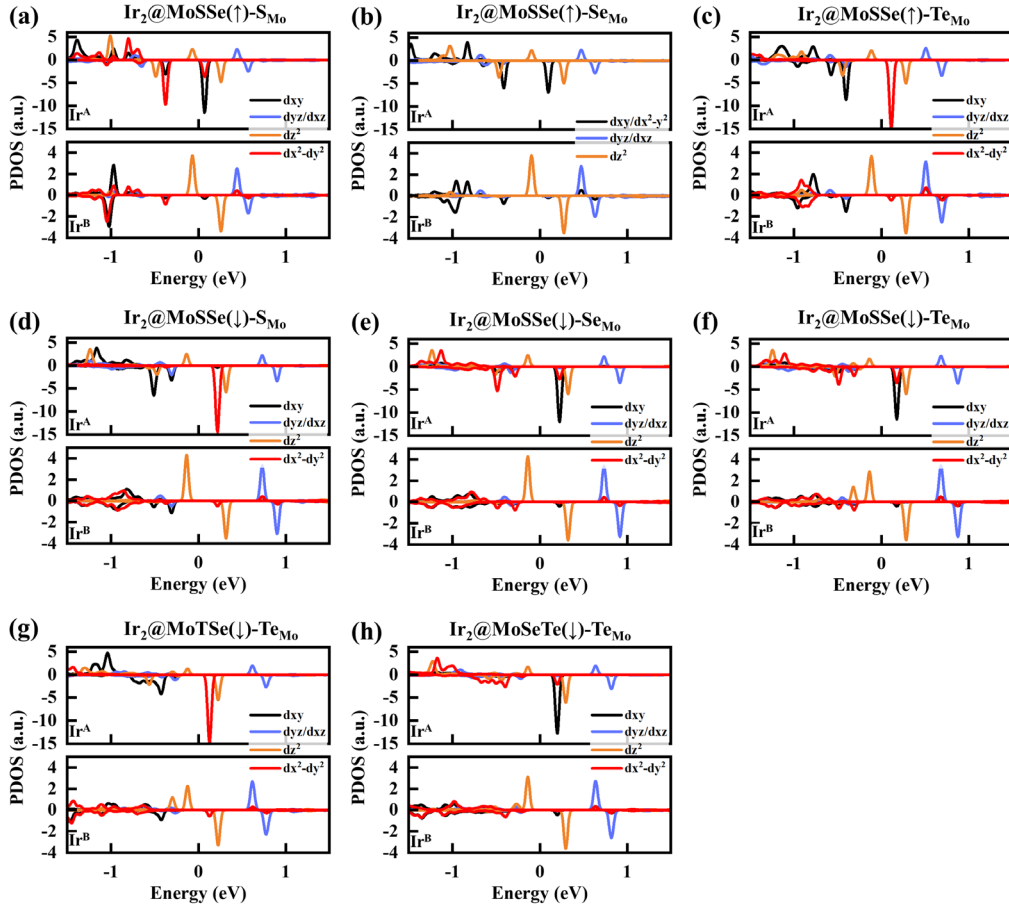

**Fig. S6** Projected density of states of d orbitals of Ir<sup>A</sup> and Ir<sup>B</sup> atoms in Ir<sub>2</sub>@MoXY-X<sub>Mo</sub> (X, Y = S, Se, Te; X≠Y) structures.

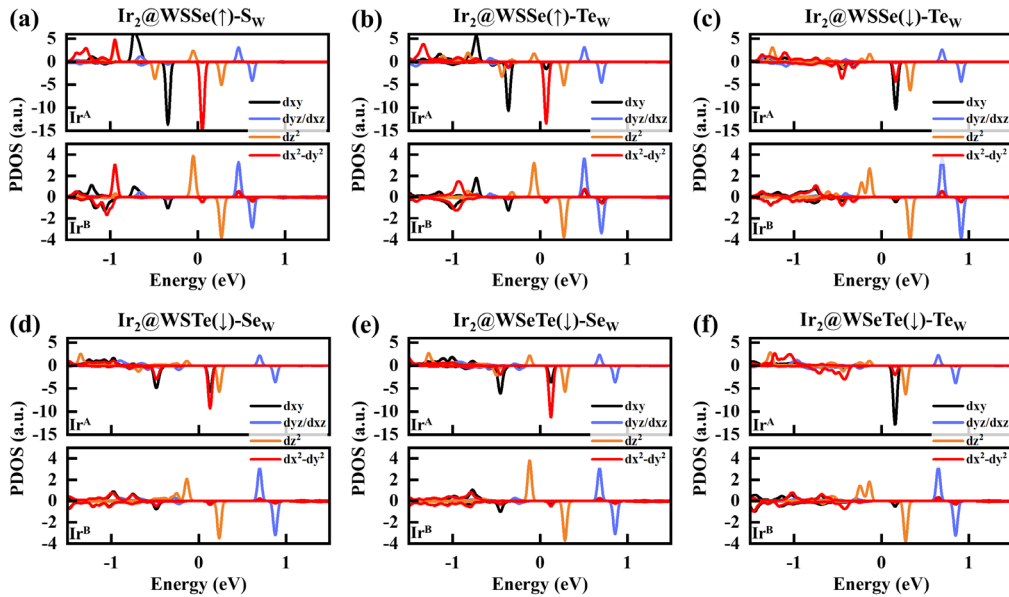

**Fig. S7** Projected density of states of d orbitals of Ir<sup>A</sup> and Ir<sup>B</sup> atoms in Ir<sub>2</sub>@WXY-X<sub>W</sub> (X, Y = S, Se, Te; X≠Y) structures.

S10. The d-orbital resolved MAE of Ir atoms in  $\text{Ir}_2@\text{TMD-X}_M$  nanosheets.

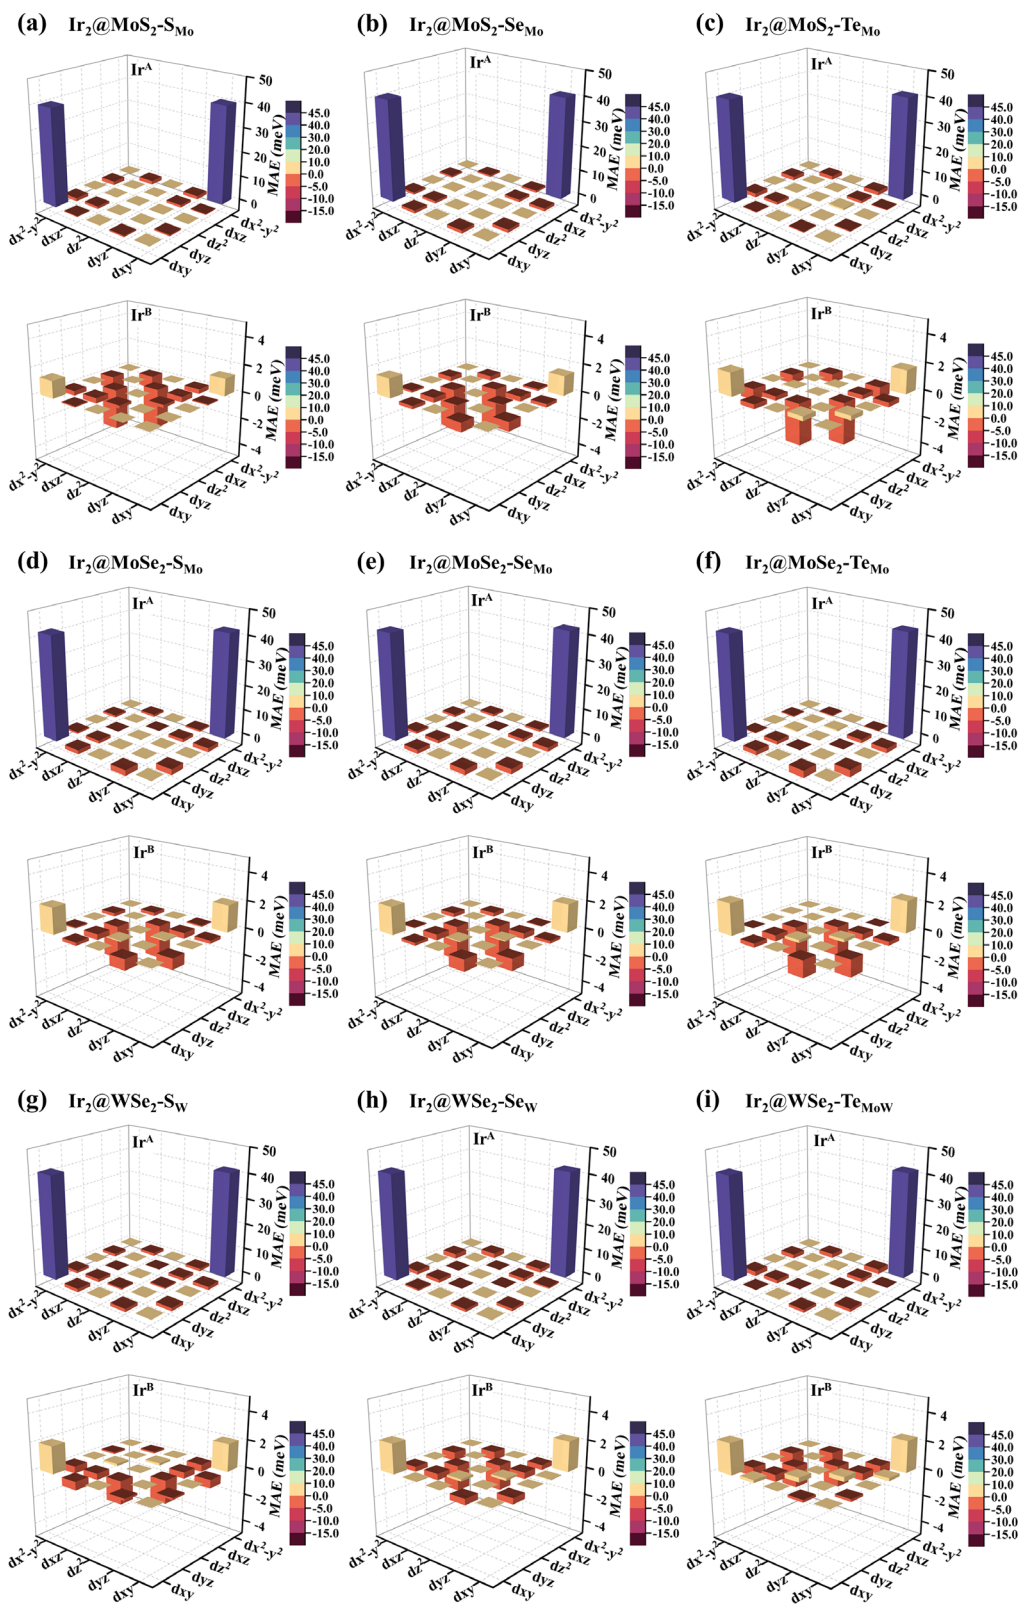

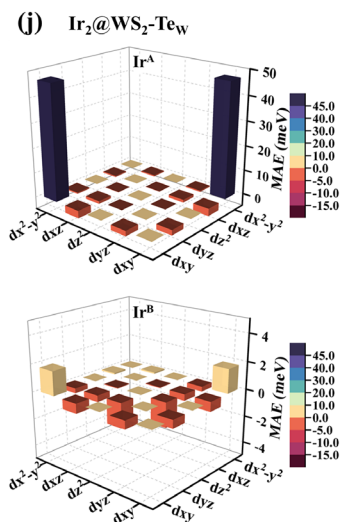

**Fig. S8** The d-orbital resolved MAE of Ir<sup>A</sup> and Ir<sup>B</sup> atoms in Ir<sub>2</sub>@MX<sub>2</sub>-X<sub>M</sub> (M = Mo, W; X = S, Se, Te) structures.

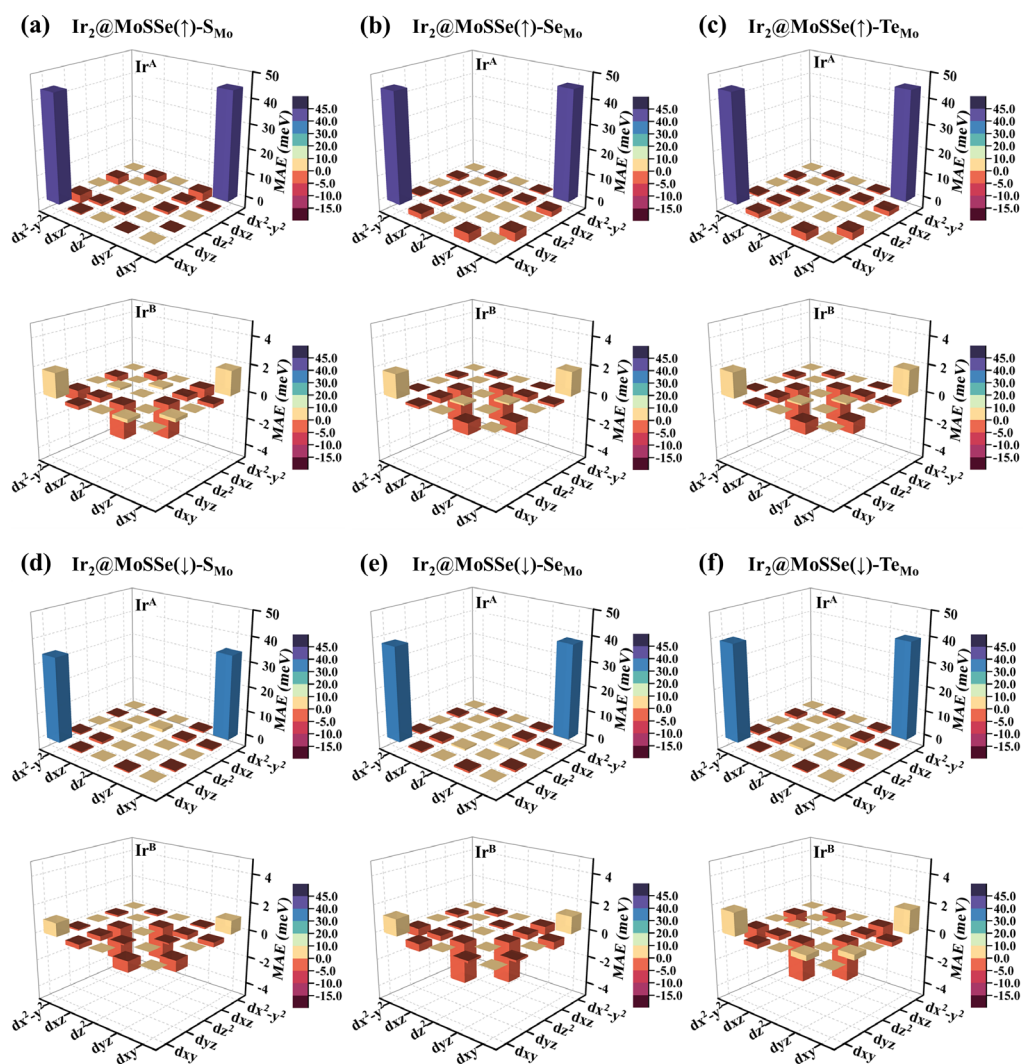



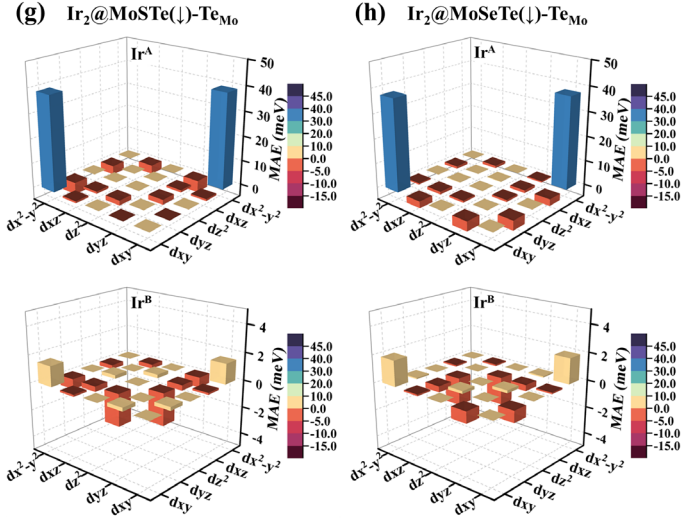

**Fig. S9** The d-orbital resolved MAE of Ir<sup>A</sup> and Ir<sup>B</sup> atoms in Ir<sub>2</sub>@MoXY-X<sub>M0</sub> (X, Y = S, Se, Te; X≠Y) structures.

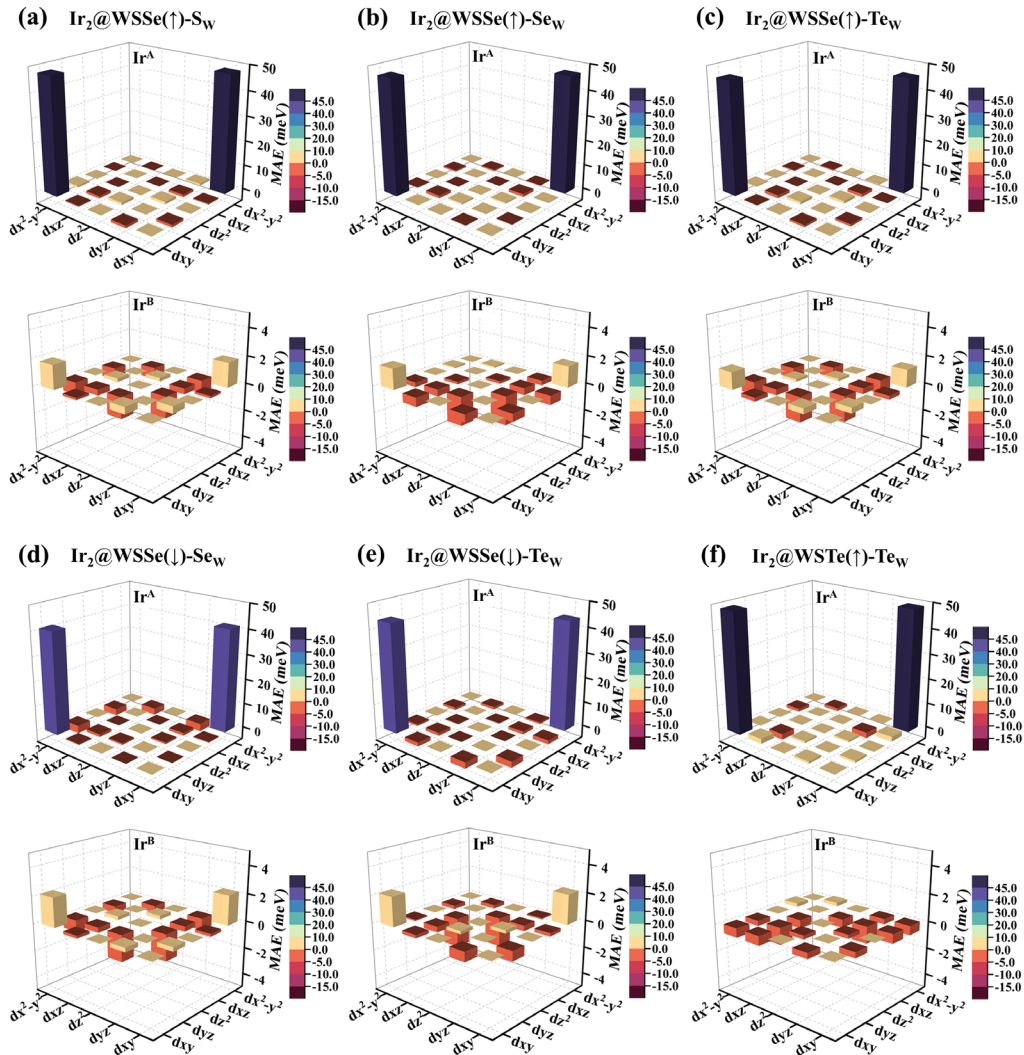



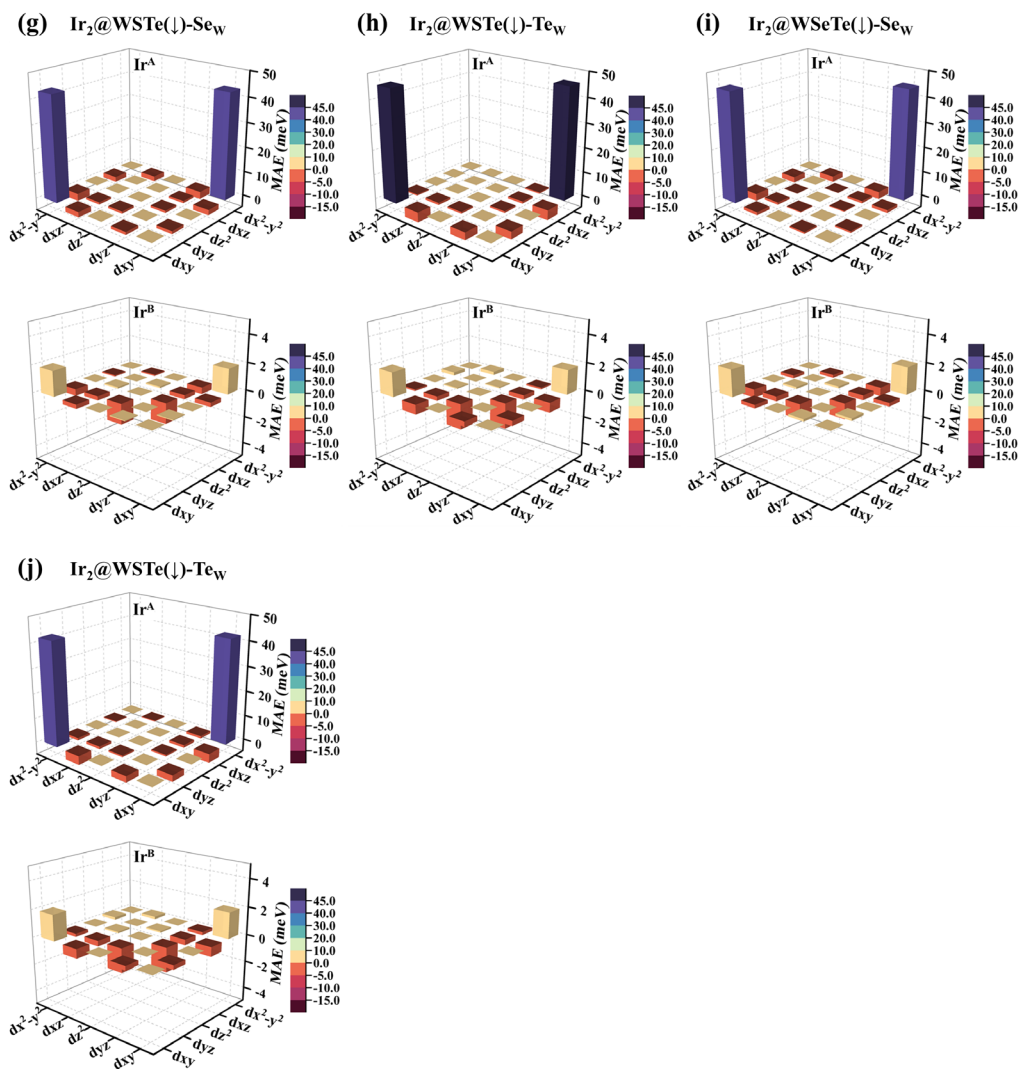

**Fig. S10** The d-orbital resolved MAE of Ir<sup>A</sup> and Ir<sup>B</sup> atoms in Ir<sub>2</sub>@WXY-X<sub>w</sub> (X, Y = S, Se, Te; X≠Y) structures.

S11. The relationship among  $\Delta V$ ,  $\epsilon_{dd}$ ,  $\epsilon_{ud}$  of vertical  $\text{Ir}_2$  above  $\text{TMD-X}_M$  nanosheets.

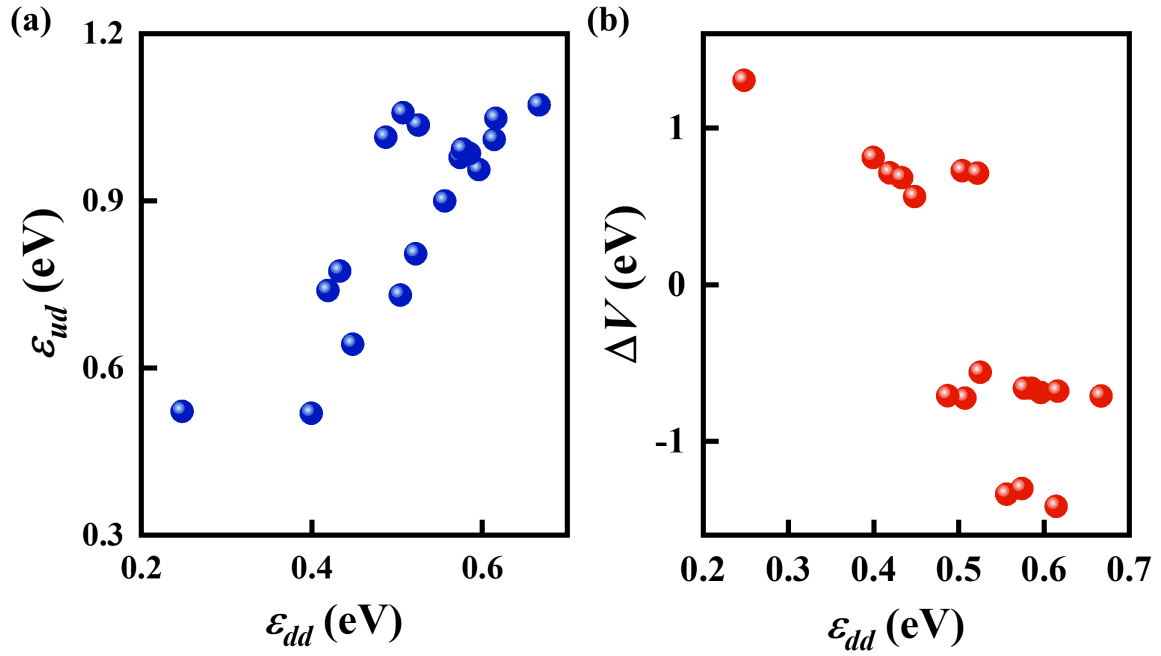

**Fig. S11** (a) The energy eigenvalues difference between occupied and unoccupied states in cross-spin states  $\epsilon_{ud}$  as a function of the one in minority states  $\epsilon_{dd}$ . (b) The average electrostatic potential differences  $\Delta V$  (eV) as a function of energy eigenvalues difference between occupied and unoccupied states  $\epsilon_{dd}$  in minority spin states.

**S12. The values of  $\epsilon_{dd}$  and  $\epsilon_{ud}$  of vertical  $\text{Ir}_2$  above Janus TMD- $X_M$  nanosheets.**

**Table S5.** Energy differences  $\epsilon_{dd}$  and  $\epsilon_{ud}$  of  $\text{Ir}_2@$  Janus TMD- $X_M$  monolayers with large MAEs ( $> 60$  meV/ $\text{Ir}_2$ ).

| Substrates                             | $\epsilon_{dd}$ (eV) |        |        | $\epsilon_{ud}$ (eV) |        |        |
|----------------------------------------|----------------------|--------|--------|----------------------|--------|--------|
|                                        | $S_M$                | $Se_M$ | $Te_M$ | $S_M$                | $Se_M$ | $Te_M$ |
| <b>MoSSe(<math>\uparrow</math>)</b>    | 0.448                | 0.504  | 0.522  | 0.643                | 0.731  | 0.805  |
| <b>MoSSe(<math>\downarrow</math>)</b>  | 0.525                | 0.507  | 0.487  | 1.036                | 1.058  | 1.014  |
| <b>MoSTe(<math>\uparrow</math>)</b>    | -                    | -      | -      | -                    | -      | -      |
| <b>MoSTe(<math>\downarrow</math>)</b>  | -                    | -      | 0.556  | -                    | -      | 0.900  |
| <b>MoSeTe(<math>\uparrow</math>)</b>   | -                    | -      | -      | -                    | -      | -      |
| <b>MoSeTe(<math>\downarrow</math>)</b> | -                    | -      | 0.596  | -                    | -      | 0.956  |
| <b>WSSe(<math>\uparrow</math>)</b>     | 0.399                | 0.419  | 0.433  | 0.519                | 0.739  | 0.774  |
| <b>WSSe(<math>\downarrow</math>)</b>   | -                    | 0.667  | 0.616  | -                    | 1.072  | 1.048  |
| <b>WSTe(<math>\uparrow</math>)</b>     | -                    | -      | 0.248  | -                    | -      | 0.522  |
| <b>WSTe(<math>\downarrow</math>)</b>   | -                    | 0.614  | 0.574  | -                    | 1.010  | 0.978  |
| <b>WSeTe(<math>\uparrow</math>)</b>    | -                    | -      | -      | -                    | -      | -      |
| <b>WSeTe(<math>\downarrow</math>)</b>  | -                    | 0.585  | 0.577  | -                    | 0.985  | 0.993  |
